# Supplementary material
Source: publisher figshare collection journal article supplement (https://frontiersin.figshare.com/ndownloader/files/28809657)
Supplement: Supplementary file 1 [file 28809657]

**Supplementary Table 2.** Variance partitioning according to taxonomy (nested design: genus/species), site, and residual for foliar N of Fabaceae N2-fixers and non-fixers. SD: standard deviation of the variance; R2*GLMM*: conditional coefficient of determination for the generalized linear mixed model according toNakagawa et al. (2017).

| **Factor** | **Variance** | **SD** |
| --- | --- | --- |
| **Fixers** |  |  |
| Species:Genus | 0.019 | 0.138 |
| Genus | 0.015 | 0.123 |
| Site | 0.037 | 0.193 |
| Residual | 0.040 | 0.200 |
| Total variance | 0.111 |  |
| R2*GLMM* = 0.64 |  |  |
|  |  |  |
| **Non-fixers** |  |  |
| Species:Genus | 0.0022 | 0.0464 |
| Genus | 0.0338 | 0.1840 |
| Site | 0.0281 | 0.1677 |
| Residual | 0.0386 | 0.1964 |
| Total variance | 0.1027 |  |
| R2*GLMM* = 0.62 |  |  |
